# Supplementary material for: Chlorine dioxide bleaching of nineteen non-wood plant pulps
Source: publisher site journal article supplement (doi:10.1515/npprj-2020-0043), 2020-09-17
Supplement: Supplementary file 1 [file npprj-2020-0043supp.docx]

Table S1. Effect of DHT and D0 bleaching on pulp properties after EP stage

| Raw material | Temp | Kappa Factor | Kappa number | | Brightness (%) | | Viscosity (mPa.s) | |
| --- | --- | --- | --- | --- | --- | --- | --- | --- |
| UB | OB | UB | OB | UB | OB |
| Bamboo | 70 | 0.15 | 3.49 | 3.31 | 75.95 | 70.75 | 14.67 | 14.32 |
| 0.2 | 3.43 | 2.69 | 77.95 | 80.79 | 14.51 | 14.22 |
| 0.25 | 2.84 | 2.63 | 79.73 | 80.67 | 14.26 | 13.86 |
| 85 | 0.15 | 3.37 | 2.75 | 79.65 | 81.79 | 14.91 | 14.33 |
| 0.2 | 3.15 | 2.64 | 79.80 | 82.28 | 13.46 | 13.15 |
| 0.25 | 2.55 | 2.42 | 80.82 | 82.89 | 12.88 | 11.98 |
| Banana pseudo stem | 70 | 0.15 | 7.45 | 6.29 | 27.31 | 35.29 | 17.23 | 17.02 |
| 0.2 | 7.02 | 6.00 | 31.11 | 41.68 | 16.54 | 16.11 |
| 0.25 | 6.33 | 5.87 | 39.42 | 44.78 | 16.05 | 15.76 |
| 85 | 0.15 | 5.81 | 5.13 | 28.61 | 37.88 | 17.24 | 16.47 |
| 0.2 | 5.30 | 5.19 | 31.40 | 42.75 | 16..47 | 15.76 |
| 0.25 | 5.08 | 4.81 | 40.09 | 45.59 | 15.08 | 14.51 |
| Banana leaf | 70 | 0.15 | 19.10 | 18.32 | 59.48 | 58.16 | 20.21 | 20.02 |
| 0.20 | 18.23 | 17.43 | 61.62 | 63.42 | 19.38 | 19.23 |
| 0.25 | 17.33 | 16.37 | 61.3 | 62.23 | 18.88 | 18.67 |
| 85 | 0.15 | 19.15 | 17.47 | 59.44 | 60.64 | 19.93 | 19.45 |
| 0.20 | 18.12 | 16.55 | 65.72 | 61.38 | 19.14 | 18.93 |
| 0.25 | 17.02 | 15.56 | 66.90 | 65.24 | 18.89 | 18.79 |
| Banana peduncle | 70 | 0.15 | 2.73 | 3.51 | 57.16 | 59.59 | 14.54 | 14.26 |
| 0.20 | 2.23 | 2.20 | 58.97 | 60.47 | 13.36 | 13.48 |
| 0.25 | 1.63 | 1.71 | 59.73 | 62.15 | 12.33 | 12.26 |
| 85 | 0.15 | 1.91 | 1.90 | 59.41 | 59.64 | 12.54 | 12.43 |
| 0.20 | 1.54 | 1.56 | 61.69 | 63.24 | 11.55 | 11.36 |
| 0.25 | 1.08 | 1.02 | 68.98 | 68.03 | 10.39 | 9.59 |
| Cassava stalks | 70 | 0.15 | 3.62 | 2.15 | 43.11 | 43.94 | 11.81 | 10.87 |
| 0.20 | 3.03 | 2.04 | 51.54 | 52.44 | 11.03 | 10.34 |
| 0.25 | 2.56 | 1.67 | 61.72 | 61.35 | 10.76 | 9.68 |
| 85 | 0.15 | 2.55 | 1.93 | 44.43 | 44.48 | 11.34 | 9.66 |
| 0.2 | 1.98 | 1.43 | 51.85 | 53.70 | 10.65 | 8.75 |
| 0.25 | 1.36 | 1.12 | 61.84 | 61.82 | 9.65 | 7.34 |
| Chia stalks | 70 | 0.15 | 4.57 | 3.20 | 45.77 | 52.80 | 7.65 | 6.30 |
| 0.20 | 3.48 | 2.67 | 62.58 | 60.59 | 7.13 | 6.17 |
| 0.25 | 3.11 | 2.30 | 63.51 | 62.42 | 6.84 | 5.78 |
| 85 | 0.15 | 2.87 | 2.51 | 49.82 | 55.17 | 7.33 | 6.94 |
| 0.20 | 2.07 | 1.87 | 62.05 | 61.94 | 7.50 | 6.11 |
| 0.25 | 1.89 | 1.32 | 64.35 | 64.33 | 6.72 | 5.61 |

Continuation of Table S1

| Raw material | Temp | Kappa Factor | Kappa number | | Brightness (%) | | Viscosity (mPa.s) | |
| --- | --- | --- | --- | --- | --- | --- | --- | --- |
| UB | OB | UB | OB | UB | OB |
| Cotton stalks | 70 | 0.15 | 3.30 | 3.13 | 66.70 | 65.80 | 10.76 | 10.31 |
| 0.20 | 2.71 | 2.32 | 67.01 | 67.10 | 10.23 | 9.78 |
| 0.25 | 1.85 | 1.14 | 68.9 | 69.6 | 9.36 | 9.14 |
| 85 | 0.15 | 2.14 | 1.94 | 67.1 | 66.6 | 9.56 | 9.21 |
| 0.20 | 1.64 | 1.36 | 68.9 | 69.2 | 8.12 | 8.06 |
| 0.25 | 1.01 | 0.88 | 72.2 | 72.5 | 7.78 | 7.61 |
| Dhaincha | 70 | 0.15 | 1.93 | 1.46 | 76.57 | 80.59 | 12.45 | 12.32 |
| 0.2 | 2.34 | 2.22 | 77.06 | 81.79 | 11.65 | 11.34 |
| 0.25 | 2.22 | 1.93 | 78.53 | 83.23 | 11.04 | 10.65 |
| 85 | 0.15 | 2.59 | 2.55 | 77.86 | 82.04 | 11.36 | 11.12 |
| 0.20 | 1.97 | 2.02 | 78.84 | 84.76 | 10.56 | 10.48 |
| 0.25 | 1.75 | 1.78 | 79.00 | 85.91 | 9.69 | 9.26 |
| Jute fiber | 70 | 0.15 | 3.50 | 2.50 | 79.00 | 79.09 | 10.34 | 10.22 |
| 0.20 | 2.98 | 2.02 | 79.58 | 80.52 | 10.21 | 9.69 |
| 0.25 | 2.45 | 2.35 | 80.15 | 81.76 | 9.43 | 9.16 |
| 85 | 0.15 | 2.95 | 2.51 | 80.93 | 81.49 | 10.26 | 9.79 |
| 0.20 | 2.71 | 2.11 | 81.76 | 81.59 | 9.25 | 8.86 |
| 0.25 | 1.41 | 1.03 | 80.93 | 83.07 | 8.21 | 7.48 |
| Jute stick | 70 | 0.15 | 2.53 | 2.73 | 75.4 | 76.99 | 12.67 | 12.14 |
| 0.20 | 2.03 | 2.21 | 80.03 | 79.80 | 11.34 | 11.07 |
| 0.25 | 1.86 | 1.65 | 80.50 | 81.79 | 10.48 | 10.23 |
| 85 | 0.15 | 2.43 | 1.55 | 79.9 | 77.36 | 10.86 | 10.74 |
| 0.20 | 1.86 | 1.43 | 81.12 | 80.87 | 9.76 | 9.64 |
| 0.25 | 1.31 | 1.15 | 81.80 | 81.49 | 7.85 | 7.13 |
| Eggplant stalks | 70 | 0.15 | 3.17 | 3.14 | 63.81 | 70.85 | 10.35 | 10.02 |
| 0.20 | 2.12 | 1.78 | 72.18 | 73.64 | 9.38 | 9.18 |
| 0.25 | 1.87 | 1.45 | 72.67 | 77.05 | 9.55 | 8.97 |
| 85 | 0.15 | 2.90 | 1.94 | 67.09 | 69.58 | 9.59 | 9.69 |
| 0.20 | 1.95 | 1.45 | 74.66 | 75.53 | 9.13 | 8.78 |
| 0.25 | 1.3726 | 1.69 | 78.68 | 78.90 | 8.29 | 7.04 |
| Kaun straw | 70 | 0.15 | 3.05 | 1.97 | 48.5 | 66.78 | 14.21 | 13.25 |
| 0.20 | 1.89 | 1.59 | 50.58 | 72.55 | 13.26 | 12.74 |
| 0.25 | 1.38 | 1.00 | 54.86 | 72.72 | 12.48 | 12.05 |
| 85 | 0.15 | 2.57 | 1.68 | 53.4 | 70.30 | 13.33 | 13.26 |
| 0.20 | 1.58 | 1.23 | 55.68 | 71.63 | 12.98 | 12.27 |
| 0.25 | 1.12 | 1.03 | 56.25 | 74.40 | 12.49 | 11.23 |

Continuation of Table S1

| Raw material | Temp | Kappa Factor | Kappa number | | Brightness (%) | | Viscosity (mPa.s) | |
| --- | --- | --- | --- | --- | --- | --- | --- | --- |
| UB | OB | UB | OB | UB | OB |
| Mulberry stalks | 70 | 0.15 | 3.04 | 2.65 | 69.60 | 71.50 | 10.87 | 10.32 |
| 0.20 | 2.21 | 1.85 | 75.95 | 72.50 | 10.03 | 9.52 |
| 0.25 | 1.78 | 1.47 | 76.90 | 77.09 | 9.66 | 9.07 |
| 85 | 0.15 | 2.36 | 1.69 | 71.57 | 74.20 | 8.89 | 8.72 |
| 0.20 | 1.44 | 1.32 | 76.70 | 75.70 | 7.87 | 7.76 |
| 0.25 | 1.21 | 0.95 | 80.30 | 81.80 | 6.65 | 6.09 |
| Mustard stalks | 70 | 0.15 | 3.10 | 2.53 | 67.00 | 72.4 | 11.56 | 10.87 |
| 0.20 | 2.76 | 2.20 | 69.9 | 73.3 | 10.78 | 10.18 |
| 0.25 | 1.81 | 1.88 | 71.2 | 74.2 | 9.79 | 9.43 |
| 85 | 0.15 | 2.89 | 2.87 | 67.4 | 76.5 | 10.88 | 10.36 |
| 0.20 | 2.72 | 1.63 | 70.1 | 77.87 | 9.79 | 9.34 |
| 0.25 | 2.41 | 1.43 | 71.8 | 78.4 | 8.51 | 8.73 |
| Okra stalks | 70 | 0.15 | 13.96 | 8.95 | 28.94 | 44.68 | 20.68 | 19.87 |
| 0.20 | 11.76 | 7.78 | 41.06 | 52.60 | 19.21 | 19.02 |
| 0.25 | 11.23 | 6.62 | 47.21 | 56.41 | 18.34 | 18.36 |
| 85 | 0.15 | 11.38 | 6.05 | 30.83 | 45.48 | 19.66 | 19.14 |
| 0.20 | 9.61 | 5.15 | 45.41 | 54.96 | 18.81 | 18.35 |
| 0.25 | 8.59 | 4.03 | 49.92 | 57.99 | 17.57 | 17.31 |
| Pineapple leaves | 70 | 0.15 | 5.33 | 5.13 | 46.31 | 50.74 | 10.47 | 10.05 |
| 0.20 | 4.35 | 4.32 | 52.51 | 52.56 | 9.56 | 9.07 |
| 0.25 | 3.36 | 3.03 | 56.51 | 57.16 | 8.78 | 8.27 |
| 85 | 0.15 | 4.73 | 3.16 | 52.27 | 51.91 | 9.87 | 9.26 |
| 0.20 | 3.40 | 3.30 | 56.68 | 58.81 | 8.36 | 8.07 |
| 0.25 | 3.33 | 2.87 | 58.79 | 59.65 | 6.65 | 6.39 |
| Red lentil stalks | 70 | 0.15 | 6.20 | 5.59 | 62.98 | 61.60 | 10.22 | 9.78 |
| 0.20 | 4.84 | 4.47 | 67.94 | 65.54 | 9.34 | 8.86 |
| 0.25 | 3.23 | 3.08 | 72.76 | 70.89 | 7.87 | 7.65 |
| 85 | 0.15 | 6.1 | 5.7 | 68.02 | 68.28 | 9.54 | 8.85 |
| 0.20 | 4.22 | 3.96 | 70.63 | 71.27 | 7.87 | 7.55 |
| 0.25 | 3.15 | 3.03 | 75.49 | 75.73 | 6.69 | 5.45 |
| Rice straw | 70 | 0.15 | 2.43 | 1.85 | 66.64 | 67.34 | 16.65 | 18.47 |
| 0.20 | 1.32 | 1.62 | 67.39 | 67.77 | 15.67 | 18.27 |
| 0.25 | 1.11 | 0.79 | 68.59 | 68.14 | 14.91 | 17.38 |
| 85 | 0.15 | 1.32 | 0.95 | 67.7 | 68.33 | 16.25 | 15.87 |
| 0.20 | 1.23 | 0.43 | 70.43 | 70.31 | 15.38 | 15.31 |
| 0.25 | 0.86 | 0.33 | 70.86 | 71.67 | 14.96 | 14.37 |
| Wheat straw | 70 | 0.15 | 1.81 | 0.95 | 72.62 | 72.71 | 15.76 | 15.26 |
| 0.20 | 1.83 | 0.93 | 74.51 | 73.46 | 14.98 | 14.32 |
| 0.25 | 0.99 | 0.81 | 75.84 | 73.84 | 14.61 | 14.10 |

Continuation of Table S1

| Raw material | Temp | Kappa Factor | Kappa number | | Brightness (%) | | Viscosity (mPa.s) | |
| --- | --- | --- | --- | --- | --- | --- | --- | --- |
| UB | OB | UB | OB | UB | OB |
|  | 85 | 0.15 | 1.50 | 0.78 | 74.84 | 75.19 | 14.96 | 15.39 |
| 0.20 | 1.38 | 0.63 | 75.93 | 76.78 | 14.69 | 14.52 |
| 0.25 | 0.79 | 0.44 | 75.92 | 77.38 | 13.44 | 13.16 |

Table S2. Effect of DHT and D0 bleaching on final pulp properties

| Raw material | Temp  oC | Kappa Factor | Brightness (%) | | Viscosity (mPa.s) | |
| --- | --- | --- | --- | --- | --- | --- |
| UB | OD | UB | OD |
| Bamboo | 70 | 0.15 | 80.67 | 80.59 | 14.47 | 14.23 |
| 0.20 | 82.55 | 82.93 | 13.53 | 13.14 |
| 0.25 | 83.93 | 85.51 | 12.78 | 12.53 |
| 85 | 0.15 | 82.99 | 84.97 | 13.33 | 13.24 |
| 0.20 | 83.76 | 85.15 | 12.75 | 12.45 |
| 0.25 | 84.81 | 85.40 | 11.88 | 11.98 |
| Banana pseudo stem | 70 | 0.15 | 38.89 | 45.05 | 15.35 | 15.07 |
| 0.20 | 43.72 | 44.51 | 14.75 | 14.46 |
| 0.25 | 44.21 | 44.97 | 14.33 | 14.05 |
| 85 | 0.15 | 37.21 | 41.13 | 15.04 | 14.76 |
| 0.20 | 42.49 | 43.30 | 14.56 | 14.55 |
| 0.25 | 44.23 | 44.39 | 14.08 | 14.51 |
| Banana leaf | 70 | 0.15 | 65.41 | 56.97 | 18.23 | 17.22 |
| 0.20 | 60.76 | 59.54 | 17.32 | 17.03 |
| 0.25 | 59.41 | 65.02 | 16.26 | 16.32 |
| 85 | 0.15 | 60.25 | 61.90 | 17.87 | 17.14 |
| 0.20 | 62.17 | 63.00 | 17.21 | 16.95 |
| 0.25 | 63.35 | 62.75 | 16.89 | 15.79 |
| Banana peduncle | 70 | 0.15 | 68.64 | 69.33 | 17.12 | 16.76 |
| 0.20 | 71.83 | 71.33 | 16.37 | 15.89 |
| 0.25 | 73.10 | 73.35 | 15.34 | 15.21 |
| 85 | 0.15 | 69.06 | 66.65 | 16.76 | 15.05 |
| 0.20 | 70.51 | 70.79 | 15.36 | 14.58 |
| 0.25 | 78.76 | 78.91 | 14.39 | 12.59 |
| Cassava stalks | 70 | 0.15 | 62.46 | 62.55 | 10.43 | 9.87 |
| 0.20 | 69.06 | 70.60 | 9.45 | 8.78 |
| 0.25 | 72.58 | 75.98 | 8.44 | 7.52 |
| 85 | 0.15 | 63.74 | 64.35 | 9.87 | 9.15 |
| 0.20 | 72.71 | 73.56 | 8.55 | 8.16 |
| 0.25 | 75.50 | 75.83 | 7.65 | 7.34 |

Continuation of Table S2

| Raw material | Temp  oC | Kappa Factor | Brightness (%) | | Viscosity (mPa.s) | |
| --- | --- | --- | --- | --- | --- | --- |
| UB | OD | UB | OD |
| Chia stalks | 70 | 0.15 | 62.70 | 63.79 | 6.85 | 6.83 |
| 0.20 | 70.72 | 73.30 | 5.99 | 5.92 |
| 0.25 | 71.34 | 75.98 | 5.66 | 5.36 |
| 85 | 0.15 | 66.03 | 67.84 | 6.46 | 6.30 |
| 0.20 | 71.11 | 74.62 | 6.01 | 5.69 |
| 0.25 | 72.48 | 76.76 | 5.96 | 5.22 |
| Cotton stalks | 70 | 0.15 | 76.56 | 76.07 | 9.66 | 9.20 |
| 0.20 | 81.03 | 81.46 | 8.74 | 8.62 |
| 0.25 | 80.22 | 80.41 | 7.85 | 7.23 |
| 85 | 0.15 | 77.19 | 78.21 | 9.30 | 9.26 |
| 0.20 | 80.65 | 81.87 | 8.33 | 7.72 |
| 0.25 | 81.29 | 82.76 | 6.78 | 6.61 |
| Dhaincha | 70 | 0.15 | 82.00 | 82.87 | 10.23 | 10.10 |
| 0.20 | 83.16 | 83.46 | 9.24 | 9.05 |
| 0.25 | 84.85 | 84.93 | 9.45 | 9.21 |
| 85 | 0.15 | 82.84 | 83.53 | 8.98 | 9.0 |
| 0.20 | 86.05 | 85.61 | 8.34 | 8.65 |
| 0.25 | 87.17 | 87.13 | 7.69 | 7.26 |
| Jute fiber | 70 | 0.15 | 81.34 | 81.65 | 8.89 | 8.76 |
| 0.20 | 83.25 | 84.04 | 7.76 | 7.85 |
| 0.25 | 84.44 | 85.18 | 6.86 | 6.48 |
| 85 | 0.15 | 84.23 | 85.34 | 8.16 | 8.02 |
| 0.20 | 85.67 | 86.78 | 7.21 | 6.87 |
| 0.25 | 87.24 | 88.23 | 6.21 | 6.18 |
| Jute Stick | 70 | 0.15 | 79.33 | 79.16 | 8.87 | 8.68 |
| 0.20 | 81.83 | 81.92 | 8.24 | 8.12 |
| 0.25 | 82.02 | 82.47 | 7.34 | 7.04 |
| 85 | 0.15 | 83.68 | 83.95 | 8.45 | 8.11 |
| 0.20 | 84.02 | 84.87 | 7.63 | 7.42 |
| 0.25 | 84.84 | 85.33 | 7.45 | 7.13 |
| Eggplant stalks | 70 | 0.15 | 69.76 | 78.92 | 7.96 | 7.95 |
| 0.20 | 73.33 | 80.06 | 7.23 | 7.08 |
| 0.25 | 76.56 | 82.24 | 6.35 | 6.80 |
| 85 | 0.15 | 76.04 | 82.2 | 8.11 | 7.68 |
| 0.20 | 81.34 | 87.97 | 6.88 | 6.79 |
| 0.25 | 85.49 | 88.62 | 6.81 | 6.56 |

Continuation of Table S2

| Raw material | Temp  oC | Kappa Factor | Brightness (%) | | Viscosity (mPa.s) | |
| --- | --- | --- | --- | --- | --- | --- |
| UB | OD | UB | OD |
| Kaun straw | 70 | 0.15 | 64.09 | 65.64 | 12.23 | 11.87 |
| 0.20 | 70.06 | 72.85 | 11.86 | 11.21 |
| 0.25 | 71.16 | 72.13 | 11.23 | 10.76 |
| 85 | 0.15 | 67.92 | 69.27 | 11.23 | 10.87 |
| 0.20 | 73.89 | 73.96 | 10.56 | 10.13 |
| 0.25 | 75.11 | 76.46 | 10.49 | 9.23 |
| Mulberry stalks | 70 | 0.15 | 75.12 | 76.74 | 8.87 | 8.32 |
| 0.20 | 76.75 | 77.83 | 7.76 | 7.21 |
| 0.25 | 78.93 | 79.50 | 7.11 | 6.87 |
| 85 | 0.15 | 77.85 | 76.86 | 8.43 | 8.45 |
| 0.20 | 83.79 | 82.93 | 7.74 | 7.12 |
| 0.25 | 85.98 | 85.15 | 6.65 | 6.09 |
| Mustard stalks | 70 | 0.15 | 70.73 | 70.46 | 8.34 | 8.68 |
| 0.20 | 74.07 | 74.50 | 8.16 | 8.33 |
| 0.25 | 76.40 | 75.61 | 7.21 | 7.15 |
| 85 | 0.15 | 73.56 | 73.71 | 8.33 | 8.23 |
| 0.20 | 76.45 | 76.70 | 8.03 | 7.67 |
| 0.25 | 77.64 | 77.06 | 7.51 | 7.33 |
| Okra stalks | 70 | 0.15 | 54.75 | 54.41 | 18.76 | 18.54 |
| 0.20 | 56.49 | 57.04 | 18.14 | 18.23 |
| 0.25 | 62.75 | 67.12 | 17.67 | 17.78 |
| 85 | 0.15 | 59.62 | 59.36 | 18.86 | 18.35 |
| 0.20 | 64.85 | 66.69 | 18.34 | 17.56 |
| 0.25 | 65.30 | 67..94 | 17.57 | 17.32 |
| Pineapple leaves | 70 | 0.15 | 60.47 | 60.67 | 8.27 | 8.24 |
| 0.20 | 62.50 | 63.58 | 7.85 | 7.38 |
| 0.25 | 67.44 | 67.73 | 7.29 | 6.95 |
| 85 | 0.15 | 64.9 | 60.99 | 8.14 | 7.64 |
| 0.20 | 68.37 | 68.40 | 7.24 | 7.11 |
| 0.25 | 69.41 | 69.76 | 6.65 | 6.59 |
| Red lentil stalks | 70 | 0.15 | 40.57 | 68.86 | 6.88 | 6.79 |
| 0.20 | 77.84 | 72.60 | 6.36 | 6.08 |
| 0.25 | 78.55 | 74.88 | 5.86 | 5.45 |
| 85 | 0.15 | 73.58 | 70.45 | 6.38 | 6.28 |
| 0.20 | 77.52 | 77.67 | 5.83 | 5.64 |
| 0.25 | 79.34 | 79.37 | 5.69 | 5.55 |

Continuation of Table S2

| Raw material | Temp  oC | Kappa Factor | Brightness (%) | | Viscosity (mPa.s) | |
| --- | --- | --- | --- | --- | --- | --- |
| UB | OD | UB | OD |
| Rice straw | 70 | 0.15 | 73.27 | 75.82 | 16.39 | 15.91 |
| 0.20 | 75.28 | 76.12 | 15.43 | 16.35 |
| 0.25 | 75.30 | 77.12 | 14.96 | 16.25 |
| 85 | 0.15 | 76.61 | 76.01 | 16.09 | 14.76 |
| 0.20 | 74.27 | 76.98 | 15.30 | 15.66 |
| 0.25 | 75.02 | 77.08 | 15.05 | 15.31 |
| Wheat straw | 70 | 0.15 | 87.34 | 90.17 | 15.09 | 15.26 |
| 0.20 | 88.86 | 90.24 | 14.62 | 14.32 |
| 0.25 | 91.14 | 90.79 | 14.18 | 14.09 |
| 85 | 0.15 | 90.02 | 91.30 | 15.56 | 15.24 |
| 0.20 | 90.72 | 91.67 | 14.14 | 14.39 |
| 0.25 | 91.21 | 92.32 | 14.05 | 14.75 |
